# Supplementary material
Source: HighWire-hosted journal article supplement (https://jnm.snmjournals.org/highwire/filestream/95222/field_highwire_adjunct_files/0/197202_Supplemental_Data.pdf)
Supplement: 197202_Supplemental_Data.pdf [file 197202_Supplemental_Data.pdf]

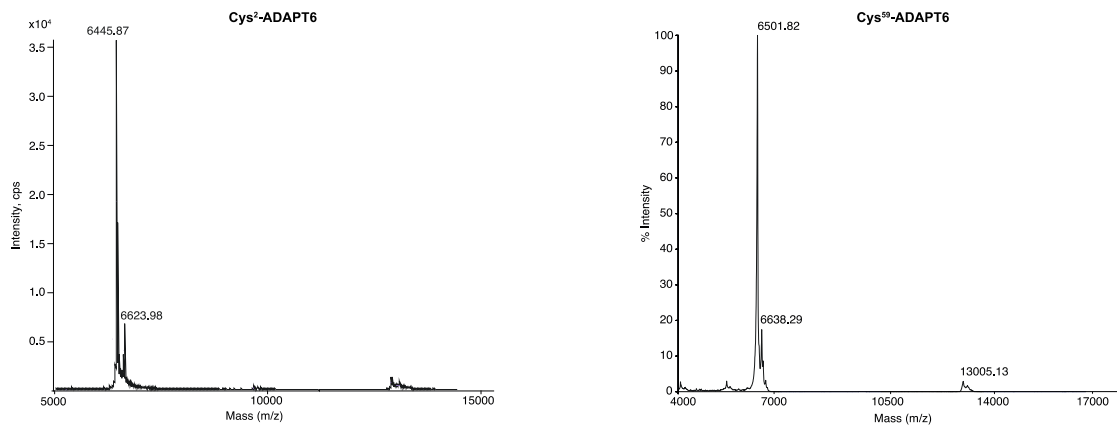

**Supplemental Figure 1.** Mass spectra of purified ADAPT6 variants showing the molecular weights of Cys<sup>2</sup>-ADAPT6 (6447 Da) and Cys<sup>59</sup>-ADAPT6 (6502 Da). Theoretical values were calculated to 6445.2 and 6502.2 Da, respectively. The molecular weight of the variants was measured by matrix assisted laser desorption ionization (MALDI) using a 4800 MALDI TOF/TOF analyzer (SCIEX).

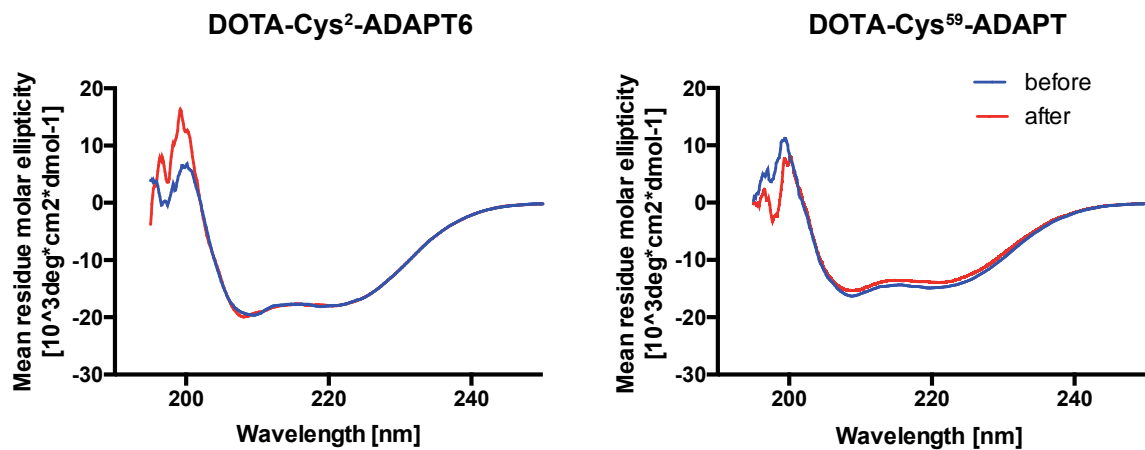

**Supplemental Figure 2.** Overlay of circular dichroism spectra from 250-195 nm for DOTA-Cys<sup>2</sup>-ADAPT6 and DOTA-Cys<sup>59</sup>-ADAPT6 before (blue) and after (red) heating from 20-90°C. The spectra show high alpha helical content of the protein domains. Also the ability to fully refold to the original secondary structure after heating to 90°C can be seen when comparing the blue and red curves. The secondary structure, melting temperature and refolding properties were determined by circular dichroism (CD) using a JASCO J-810 spectropolarimeter (JASCO).

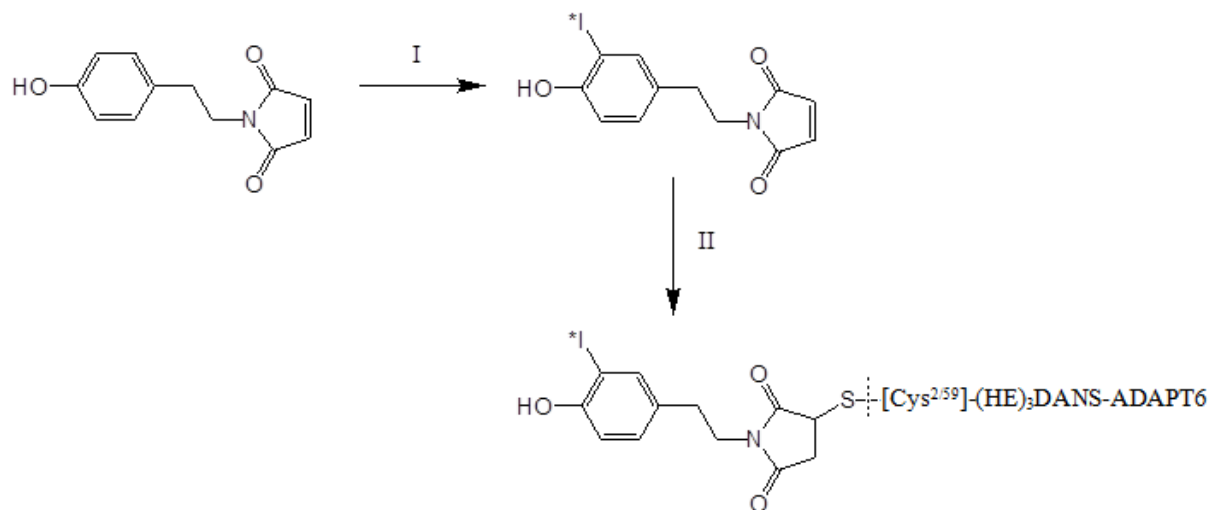

**Supplemental Figure 3.** Indirect radioiodination of Cys<sup>2/59</sup>-ADAPT6 molecules using HPEM. I: <sup>125</sup>I- 5% ACOH in MeOH; Chloramine-T; 5 min at room temperature; II: freshly reduced cysteine-containing protein, ammonium acetate, pH 6.0; 60 min at room temperature

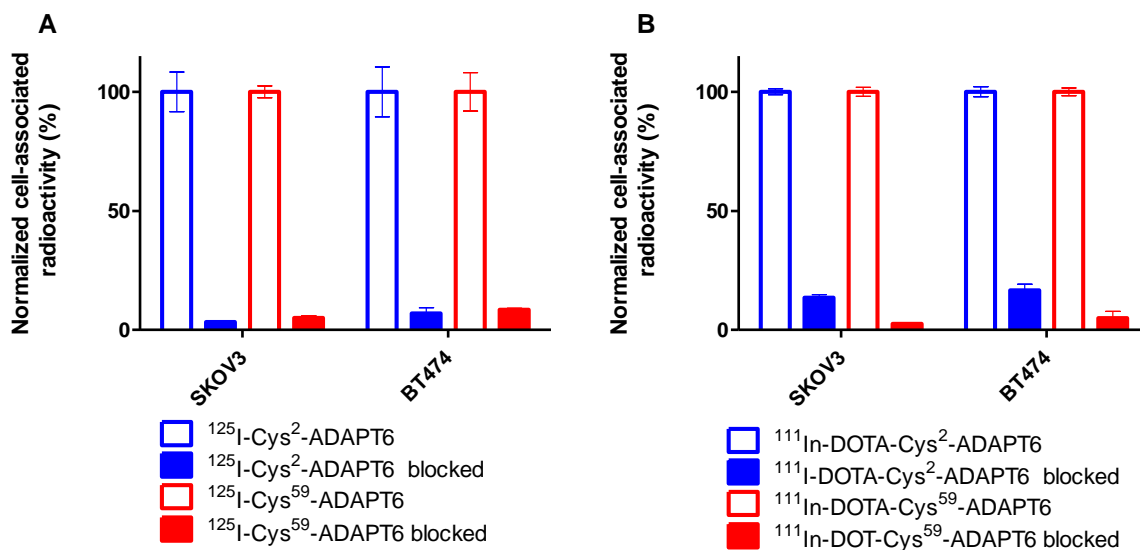

**Supplemental Figure 4.** Binding specificity of radiolabeled ADAPT6 constructs to HER2 expressing SKOV3 cells ( $1.6 \times 10^6$  receptors/cell) and BT474 cells ( $2 \times 10^6$  receptors/cell). (A)  $^{125}\text{I-DOTA-Cys}^2\text{-ADAPT6}$  and  $^{125}\text{I-DOTA-Cys}^{59}\text{-ADAPT6}$ . (B)  $^{111}\text{In-Cys}^2\text{-ADAPT6}$  and  $^{111}\text{In-HPEM-Cys}^{59}\text{-ADAPT6}$ . To test the binding specificity, 25 nM of the labeled variants was added and for receptor blocking, a 100-fold molar excess of nonlabeled corresponding ADAPT6 molecules was added. The dishes were incubated at  $37^\circ\text{C}$  for 1 h in a humidified incubator. The media was collected and by using trypsin-EDTA solution the cells were detached and radioactivity was measured. Data are presented as mean values with standard deviations ( $n=3$ ).

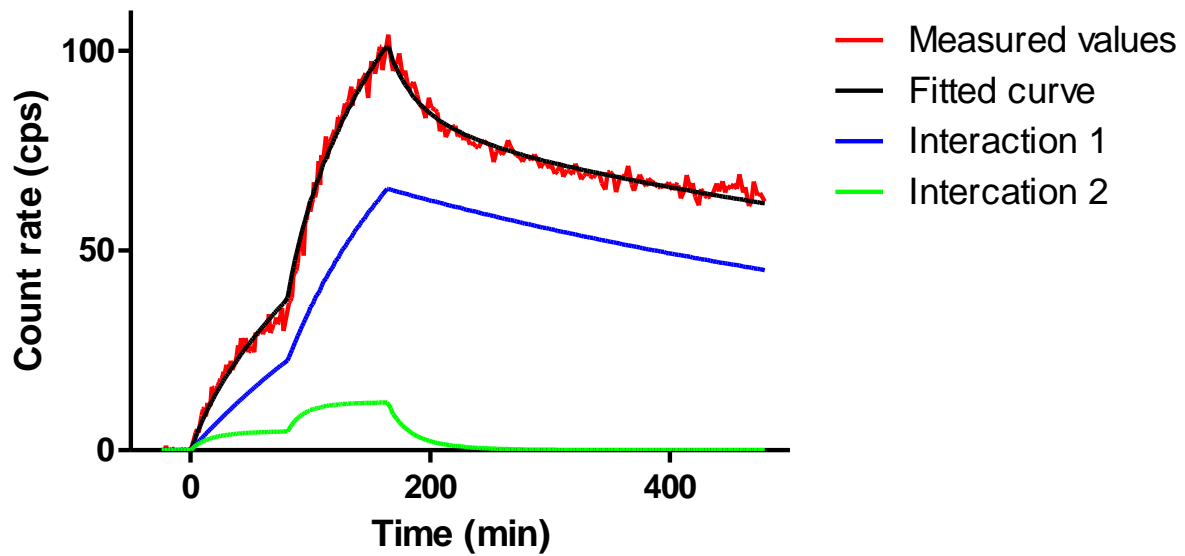

Supplemental Figure 5. Representative LignadTracer sensorgram (binding of  $^{111}\text{In}$ -DOTA-Cys<sup>2</sup>-ADAPT6 to SKOV-3 cells). Uptake curves were recorded at 0.33 and 1 nM. The curves show measured data (red), a fitted curve according to the InteractionMap (black), and the two resolved interactions; one with a slower dissociation rate (blue) and one with a more rapid dissociation (green).

**Supplemental Table 1.** Percentage of radioactivity in the high molecular fraction (<5 kDa) of blood plasma at 1 h after injection.

|                | Label                 |                        |
|----------------|-----------------------|------------------------|
| Label position | <sup>125</sup> I-HPEM | <sup>111</sup> In-DOTA |
| C-terminus     | 60±2                  | 92.7±0.9               |
| N-terminus     | 55±5                  | 92.6±0.7               |

**Supplemental Table 2.** Comparison of targeting properties of some radiometal-labeled imaging probes in mice bearing SKOV-3 xenografts.

|                                                               | Time point (h) | Uptake (% ID/g) |             |           |         | Tumor-to-organ ratio |                    |
|---------------------------------------------------------------|----------------|-----------------|-------------|-----------|---------|----------------------|--------------------|
|                                                               |                | Tumor           | Blood       | Liver     | Kidney  | Blood                | Liver              |
| <sup>111</sup> In-DOTA-Cys <sup>59</sup> -ADAPT6 <sup>a</sup> | 1              | 13±2            | 0.35±0.06   | 0.21±0.03 | 272±21  | 38±3                 | 64±10              |
|                                                               | 4              | 15±2            | 0.053±0.004 | 0.17±0.02 | 284±21  | 277±35               | 85±17 <sup>c</sup> |
| <sup>111</sup> In-ABY-025 Affibody molecule <sup>b</sup>      | 1              | 17±2            | 1.1±0.1     | 1.9±0.2   | 186±24  | 15±3                 | 8.7±0.6            |
|                                                               | 4              | 15±3            | 0.18±0.02   | 1.5±0.3   | 163±16  | 88±15                | 10±1               |
| <sup>111</sup> In-(HE) <sub>3</sub> -G3 DARPin <sup>c</sup>   | 4              | 8.8±1.3         | 0.05±0.01   | 0.7±0.1   | 232±24  | 176                  | 12.3               |
| <sup>68</sup> Ga-NOTA-2Rs15d nanobody <sup>d</sup>            | 1              | 4.2±1.0         | 0.5±0.2     | 2.9±0.3   | 38±6    | 9±3                  | 1.4                |
| <sup>111</sup> In-CHX-A''-C6.5K-A – diabody <sup>e</sup>      | 4              | 7.8             | 5.8         | 5.3       | 27.9    | 1.34                 | 1.47               |
|                                                               | 24             | 9.8             | 0.5         | 3.6       | 31      | 19.6                 | 2.7                |
| <sup>111</sup> In-DTPA-trastuzumab <sup>f</sup>               | 48             | 16.3±0.6        | 7.2±0.7     | 10±1      | 6.5±0.2 | 2.3                  | 1.63               |

<sup>a</sup> data from this study;

<sup>b</sup> data from Ahlgren S, Orlova A, Wällberg H et al. Targeting of HER2-expressing tumors using <sup>111</sup>In-ABY-025, a second-generation affibody molecule with a fundamentally reengineered scaffold. *J Nucl Med.* 2010;51:1131-1138.

<sup>c</sup> data from Goldstein R, Sosabowski J, Livanos M et al. Development of the designed ankyrin repeat protein (DARPin) G3 for HER2 molecular imaging. *Eur J Nucl Med Mol Imaging.* 2015;42:288-301.

<sup>d</sup> data from Xavier C, Vaneycken I, D'huyvetter M et al. Synthesis, preclinical validation, dosimetry, and toxicity of <sup>68</sup>Ga-NOTA-anti-HER2 Nanobodies for iPET imaging of HER2 receptor expression in cancer. *J Nucl Med.* 2013;54:776-784.

<sup>e</sup> data from Adams GP, Shaller CC, Dadachova E et al. A single treatment of yttrium-90-labeled CHX-A''-C6.5 diabody inhibits the growth of established human tumor xenografts in immunodeficient mice. *Cancer Res.* 2004;64:6200-6206.

<sup>f</sup> data from Lub-de Hooge MN, Kosterink JG, Perik PJ et al. Preclinical characterisation of <sup>111</sup>In-DTPA-trastuzumab. *Br J Pharmacol* 2004;143 99-106.
